# Supplementary material for: The prognosis of kidney transplant recipients with aorto‐iliac calcification: a systematic review and meta‐analysis
Source: PubMed Central journal article supplement — Transpl Int. 2020 Mar 4;33(5):483–96. doi: 10.1111/tri.13592 (PMC9328363; doi:10.1111/tri.13592), 2020-03-04
Supplement: TRI-33-483-s001.pdf [file TRI-33-483-s001.pdf]

|                                                                                                                                                                                                                                                                                                                                                                                                                                                                                                                                                                                                                                                                                                                                                                                                                                                                                                                                                                                                                                                                                                                                                                                                     |
|-----------------------------------------------------------------------------------------------------------------------------------------------------------------------------------------------------------------------------------------------------------------------------------------------------------------------------------------------------------------------------------------------------------------------------------------------------------------------------------------------------------------------------------------------------------------------------------------------------------------------------------------------------------------------------------------------------------------------------------------------------------------------------------------------------------------------------------------------------------------------------------------------------------------------------------------------------------------------------------------------------------------------------------------------------------------------------------------------------------------------------------------------------------------------------------------------------|
| <b>Embase.com</b>                                                                                                                                                                                                                                                                                                                                                                                                                                                                                                                                                                                                                                                                                                                                                                                                                                                                                                                                                                                                                                                                                                                                                                                   |
| ('kidney transplantation'/exp OR 'renal graft dysfunction'/exp OR (((kidney* OR renal) NEAR/3 (transplant* OR graft* OR homograft* OR autograft* OR allograft* OR transplant* OR homotransplant* OR autotransplant* OR allotransplant*)):ab,ti) AND ('aortic disease'/de OR 'aortic atherosclerosis'/de OR 'aortic constriction'/exp OR 'aortic dissection'/de OR 'aortic occlusion'/de OR 'aortic stenosis'/exp OR 'aortic surgery'/exp OR 'Leriche syndrome'/de OR 'iliac artery obstruction'/de OR (('blood vessel calcification'/de OR 'artery calcification'/de OR calcification/de OR stenosis/de OR 'artery reconstruction'/de OR 'vascular surgery'/de OR atherosclerosis/de OR arteriosclerosis/de OR 'artery occlusion'/de) AND ('iliac artery'/de OR 'aorta'/de OR 'abdominal aorta'/de)) OR (((aort* OR iliac) NEAR/6 (disease* OR atherosclero* OR sclero* OR stenosis OR calcific* OR constrict* OR dissect* OR occlusi* OR reconstruct* OR bypass OR dilatat* OR balloon OR angioplast* OR repair* OR abnormal* OR anomal* OR syndrome* OR surger* OR stent*)) OR Leriche):ab,ti) NOT ([Conference Abstract]/lim OR [Letter]/lim OR [Note]/lim OR [Editorial]/lim) AND [english]/lim |
| <b>Medline Ovid</b>                                                                                                                                                                                                                                                                                                                                                                                                                                                                                                                                                                                                                                                                                                                                                                                                                                                                                                                                                                                                                                                                                                                                                                                 |
| (Kidney Transplantation/ OR kidney/tr OR (((kidney* OR renal) ADJ3 (transplant* OR graft* OR homograft* OR autograft* OR allograft* OR transplant* OR homotransplant* OR autotransplant* OR allotransplant*)):ab,ti.) AND (Aortic Diseases/ OR aorta/su OR Leriche syndrome/ OR ((Vascular Calcification/ OR Constriction, Pathologic/ OR Vascular Surgical Procedures/ OR atherosclerosis/ OR arteriosclerosis/) AND (Iliac Artery/ OR aorta/ OR Aorta, Abdominal/)) OR (((aort* OR iliac) ADJ6 (disease* OR atherosclero* OR sclero* OR stenosis OR calcific* OR constrict* OR dissect* OR occlusi* OR reconstruct* OR bypass OR dilatat* OR balloon OR angioplast* OR repair* OR abnormal* OR anomal* OR syndrome* OR surger* OR stent*)) OR Leriche).ab,ti.) NOT (letter OR news OR comment OR editorial OR congresses OR abstracts).pt. AND english.la.                                                                                                                                                                                                                                                                                                                                        |
| <b>Cochrane CENTRAL</b>                                                                                                                                                                                                                                                                                                                                                                                                                                                                                                                                                                                                                                                                                                                                                                                                                                                                                                                                                                                                                                                                                                                                                                             |
| (((kidney* OR renal) NEAR/3 (transplant* OR graft* OR homograft* OR autograft* OR allograft* OR transplant* OR homotransplant* OR autotransplant* OR allotransplant*)):ab,ti) AND (((aort* OR iliac) NEAR/6 (disease* OR atherosclero* OR sclero* OR stenosis OR calcific* OR constrict* OR dissect* OR occlusi* OR reconstruct* OR bypass OR dilatat* OR balloon OR angioplast* OR repair* OR abnormal* OR anomal* OR syndrome* OR surger* OR stent*)) OR Leriche):ab,ti)                                                                                                                                                                                                                                                                                                                                                                                                                                                                                                                                                                                                                                                                                                                          |
| <b>Web of science</b>                                                                                                                                                                                                                                                                                                                                                                                                                                                                                                                                                                                                                                                                                                                                                                                                                                                                                                                                                                                                                                                                                                                                                                               |
| TS=(((kidney* OR renal) NEAR/2 (transplant* OR graft* OR homograft* OR autograft* OR allograft* OR transplant* OR homotransplant* OR autotransplant* OR allotransplant*))) AND (((aort* OR iliac) NEAR/5 (disease* OR atherosclero* OR sclero* OR stenosis OR calcific* OR constrict* OR dissect* OR occlusi* OR reconstruct* OR bypass OR dilatat* OR balloon OR angioplast* OR repair* OR abnormal* OR anomal* OR syndrome* OR surger* OR stent*)) OR Leriche)) ) AND DT=(article) AND LA=(english)                                                                                                                                                                                                                                                                                                                                                                                                                                                                                                                                                                                                                                                                                               |
| <b>Google scholar</b>                                                                                                                                                                                                                                                                                                                                                                                                                                                                                                                                                                                                                                                                                                                                                                                                                                                                                                                                                                                                                                                                                                                                                                               |
| "kidney renal transplant graft autograft allograft  transplant autotransplant allotransplant" "aorta aortic aortoiliac iliac disease atherosclerosis sclerosis stenosis calcification constriction occlusion reconstruction bypass surgery stent" Leriche                                                                                                                                                                                                                                                                                                                                                                                                                                                                                                                                                                                                                                                                                                                                                                                                                                                                                                                                           |

**Table S1: Search terms used for this systematic review and meta-analysis**

| Studies             | Quality assessment                       |                                                                    |                         |              |             |                                            | Sample size |      | Absolute effect (95% CI) |              | Quality          | Importance | RR (95 %CI)             |
|---------------------|------------------------------------------|--------------------------------------------------------------------|-------------------------|--------------|-------------|--------------------------------------------|-------------|------|--------------------------|--------------|------------------|------------|-------------------------|
|                     | Design                                   | Risk of bias                                                       | Inconsistency           | Indirectness | Imprecision | Publication bias                           | VC          | nVC  | VC                       | nVC          |                  |            |                         |
| 7                   | 1-year mortality                         |                                                                    |                         |              |             |                                            |             |      |                          |              |                  |            |                         |
| 1,22,23,24,25,26,27 | Observational cohort                     | Serious<br>Different exposure measurement<br>Outcome is unadjusted | Not serious<br>I2 = 0%  | Not serious  | Not serious | Not serious<br>No asymmetry in funnel plot | 763         | 2618 | 46 per 1000              | 26 per 1000  | ⊕○○○<br>VERY LOW | CRITICAL   | RR 2.19<br>(1.39-3.44)  |
| 6                   | 3-year mortality                         |                                                                    |                         |              |             |                                            |             |      |                          |              |                  |            |                         |
| 1,23,24,25,26,27    | Observational cohort                     | Serious<br>Different exposure measurement<br>Outcome is unadjusted | Not serious<br>I2 = 0%  | Not serious  | Not serious | Not serious<br>No asymmetry in funnel plot | 728         | 2544 | 121 per 1000             | 64 per 1000  | ⊕○○○<br>VERY LOW | CRITICAL   | RR 2.17<br>(1.66-2.83)  |
| 5                   | 5-year mortality                         |                                                                    |                         |              |             |                                            |             |      |                          |              |                  |            |                         |
| 1,23,24,25,27       | Observational cohort                     | Serious<br>Different exposure measurement<br>Outcome is unadjusted | Not serious<br>I2 = 0%  | Not serious  | Not serious | Not serious<br>No asymmetry in funnel plot | 678         | 2475 | 217 per 1000             | 104 per 1000 | ⊕○○○<br>VERY LOW | CRITICAL   | RR 2.28<br>(1.86-2.79)  |
| 3                   | 1-year graft loss (uncensored for death) |                                                                    |                         |              |             |                                            |             |      |                          |              |                  |            |                         |
| 22,23,26            | Observational cohort studies             | Serious<br>Different exposure measurement<br>Outcome is unadjusted | Not serious<br>I2 = 0%  | Not serious  | Not serious | Not serious<br>No asymmetry in funnel plot | 117         | 204  | 120 per 1000             | 34 per 1000  | ⊕○○○<br>VERY LOW | CRITICAL   | RR 3.15<br>(1.30-7.64)  |
| 2                   | 3-year graft loss (uncensored for death) |                                                                    |                         |              |             |                                            |             |      |                          |              |                  |            |                         |
| 23,26               | Observational cohort                     | Serious<br>Different exposure measurement<br>Outcome is unadjusted | Serious<br>I2 = 57%     | Not serious  | Not serious | Not serious<br>No asymmetry in funnel plot | 82          | 130  | 244 per 1000             | 77 per 1000  | ⊕○○○<br>VERY LOW | CRITICAL   | RR 3.41<br>(0.97-11.96) |
| 2                   | 1-year graft loss (censored for death)   |                                                                    |                         |              |             |                                            |             |      |                          |              |                  |            |                         |
| 25,26               | Observational cohort                     | Serious<br>Different exposure measurement<br>Outcome is unadjusted | Not serious<br>I2 = 28% | Not serious  | Not serious | Not serious<br>No asymmetry in funnel plot | 119         | 1070 | 92 per 1000              | 65 per 1000  | ⊕○○○<br>VERY LOW | CRITICAL   | RR 2.26<br>(0.58-8.82)  |
| 2                   | 3-year graft loss (censored for death)   |                                                                    |                         |              |             |                                            |             |      |                          |              |                  |            |                         |
| 25,26               | Observational cohort                     | Serious<br>Different exposure measurement<br>Outcome is unadjusted | Serious<br>I2 = 57%     | Not serious  | Not serious | Not serious<br>No asymmetry in funnel plot | 119         | 1070 | 210 per 1000             | 203 per 1000 | ⊕○○○<br>VERY LOW | CRITICAL   | RR 2.19<br>(0.49-9.82)  |
| 4                   | Delayed graft function                   |                                                                    |                         |              |             |                                            |             |      |                          |              |                  |            |                         |
| 22,25,26,30         | Observational cohort                     | Serious<br>Different exposure measurement<br>Outcome is unadjusted | Not serious<br>I2 = 0%  | Not serious  | Not serious | Not serious<br>No asymmetry in funnel plot | 184         | 1207 | 310 per 1000             | 341 per 1000 | ⊕○○○<br>VERY LOW | CRITICAL   | RR 1.24<br>(0.98-1.58)  |

GRADE Working Group grades of evidence

**High quality:** Further research is very unlikely to change our confidence in the estimate of effect.

**Moderate quality:** Further research is likely to have an important impact on our confidence in the estimate of effect and may change the estimate.

**Low quality:** Further research is very likely to have an important impact on our confidence in the estimate of effect and is likely to change the estimate.

**Very low quality:** We are very uncertain about the estimate.

**Table S2: Summary of findings table for studies included in meta-analysis**

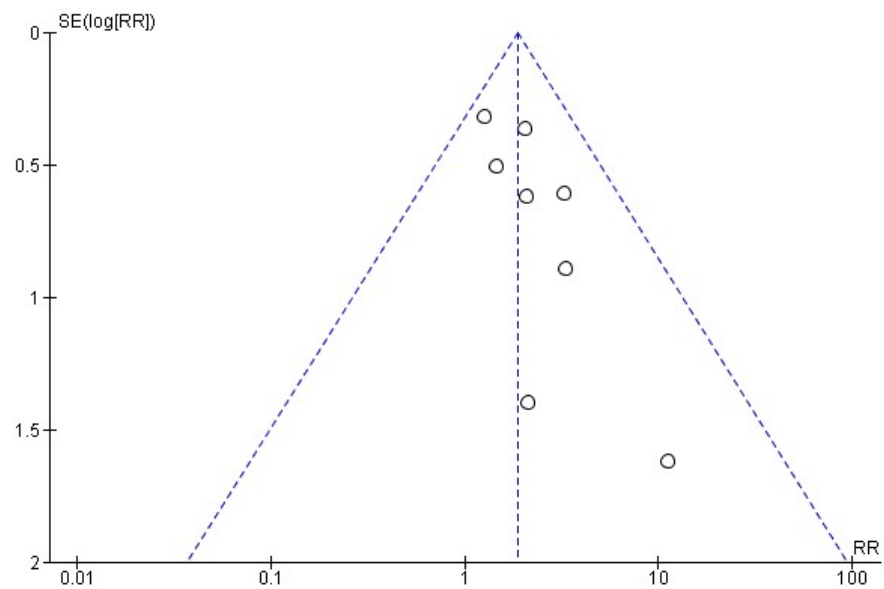

**Figure S1: funnel plot for outcome: 1-year mortality**

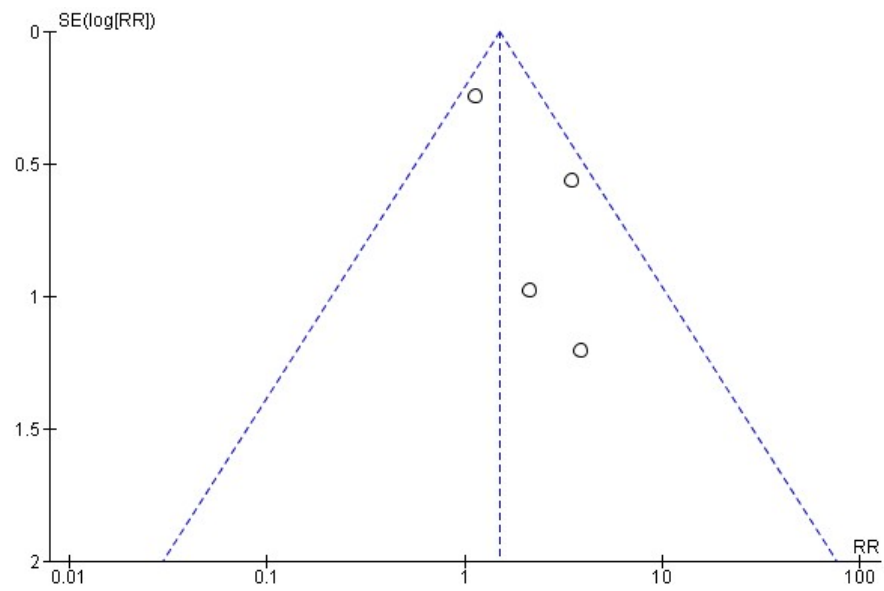

**Figure S2: funnel plot for outcome: 1-year uncensored graft loss**

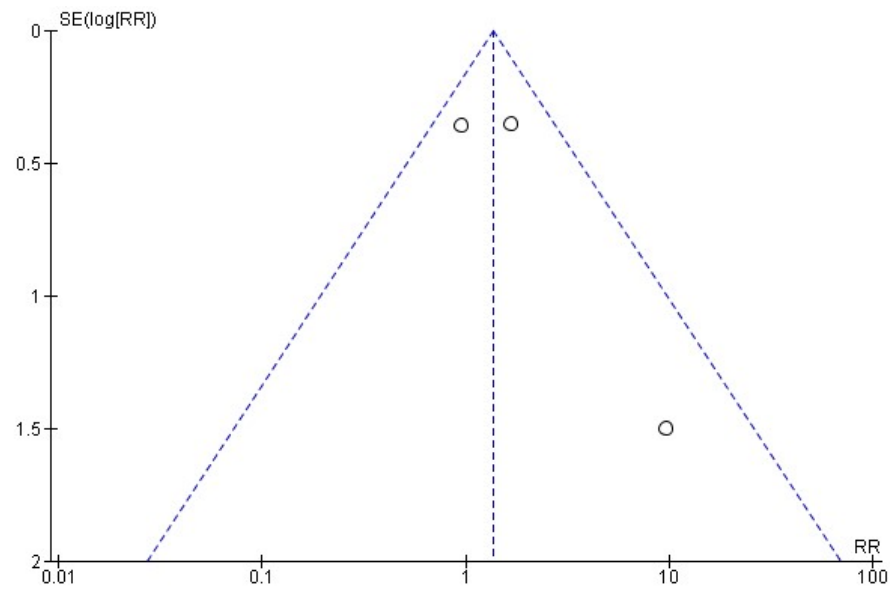

**Figure S3: funnel plot for outcome: 1-year death-censored graft loss**

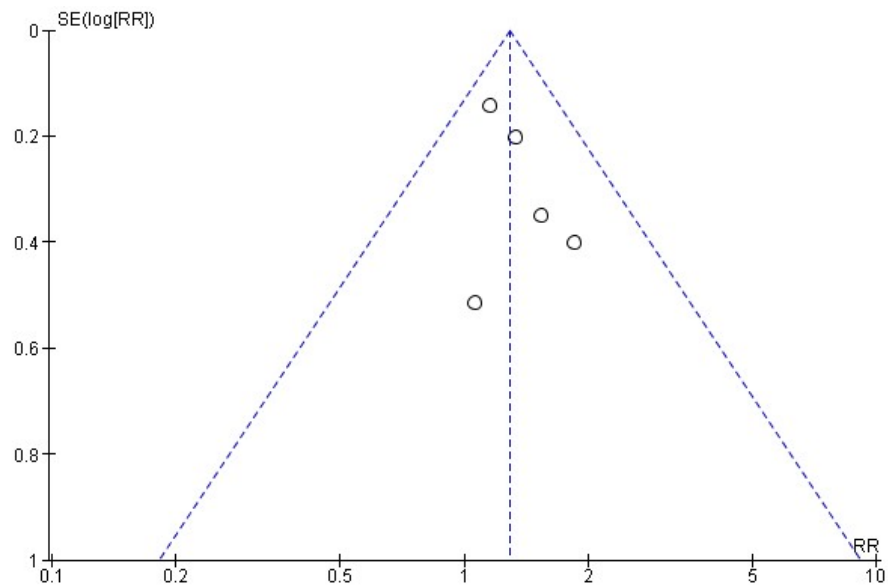

**Figure S4: funnel plot for outcome: delayed graft function**
